# Supplementary figures and images for: Natural mutation in the regulatory gene (srrG) influences virulence-associated genes and enhances invasiveness in Streptococcus dysgalactiae subsp. equisimilis strains isolated from cases of streptococcal toxic shock syndrome
Source: PubMed Central journal article supplement — eBioMedicine. 2022 Jun 29;81:104133. doi: 10.1016/j.ebiom.2022.104133 (PMC9244731; doi:10.1016/j.ebiom.2022.104133), 2022-06-29

# 80-VS-srrG

GO Term

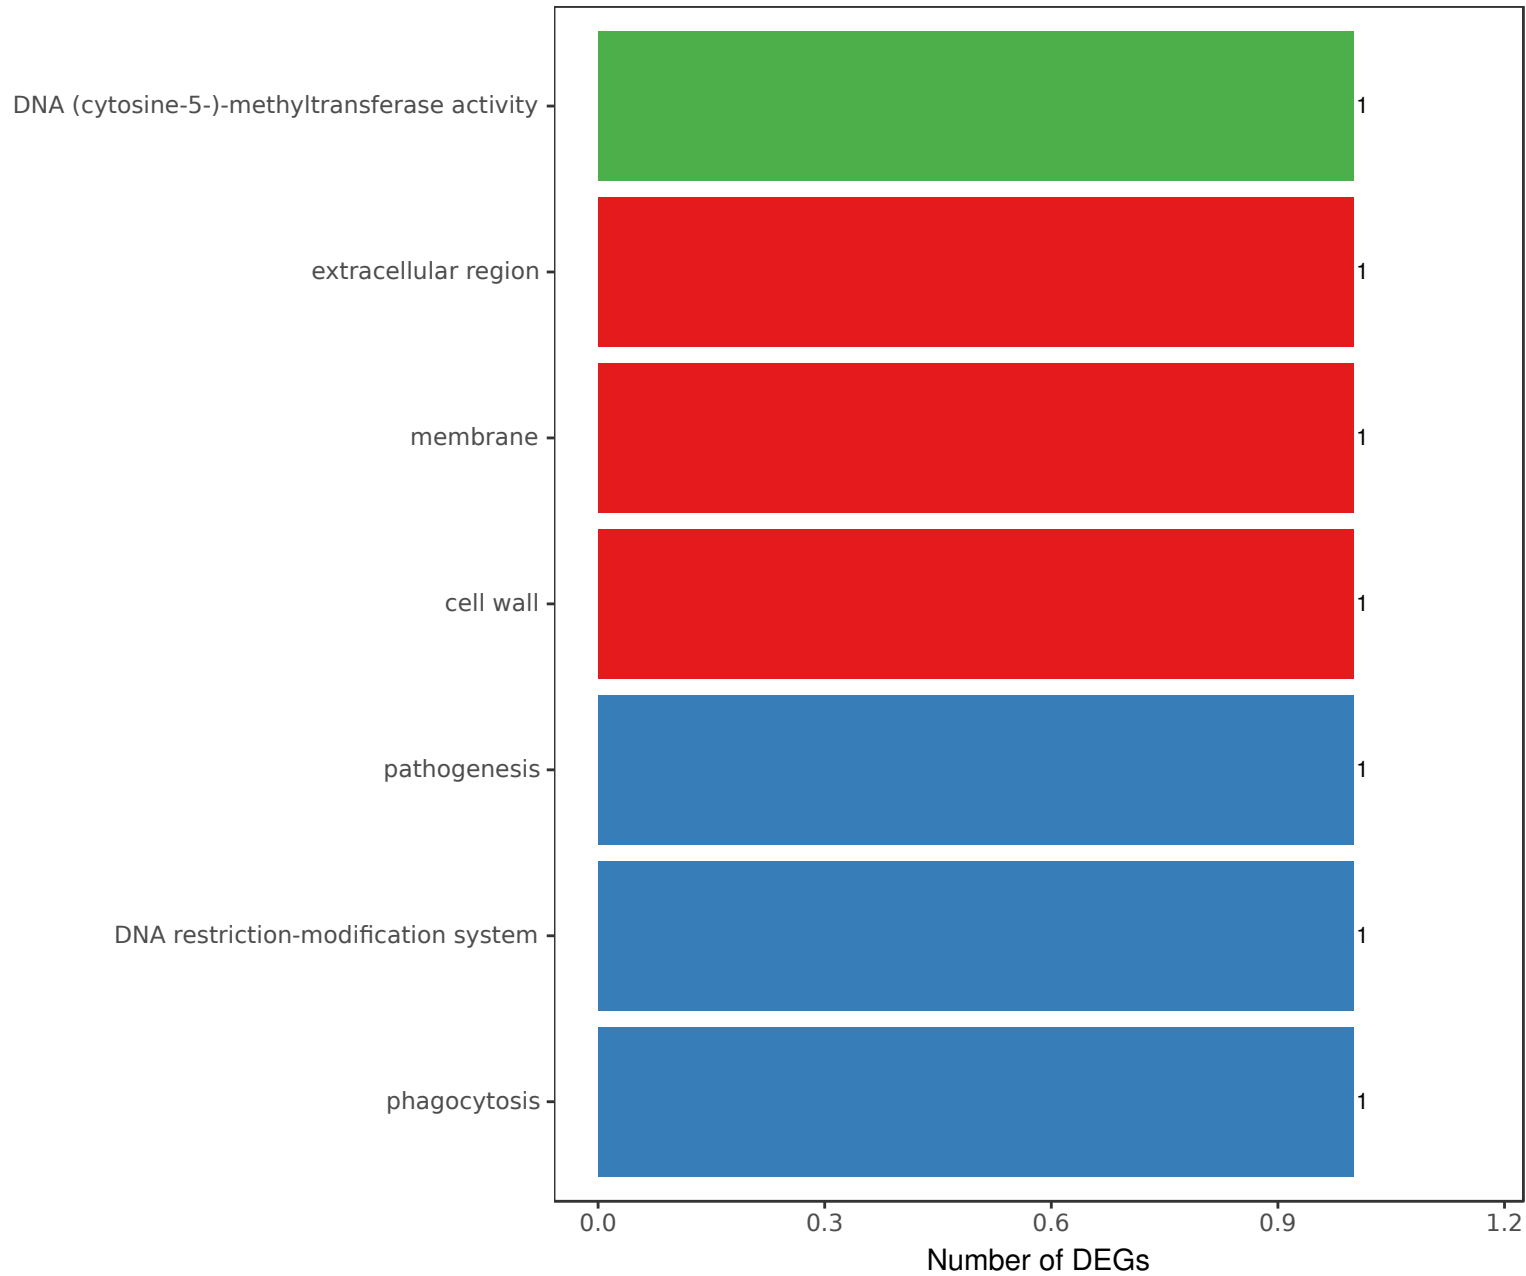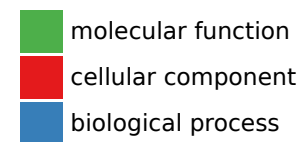

Supplement: mmc5.pdf [file mmc5.pdf]

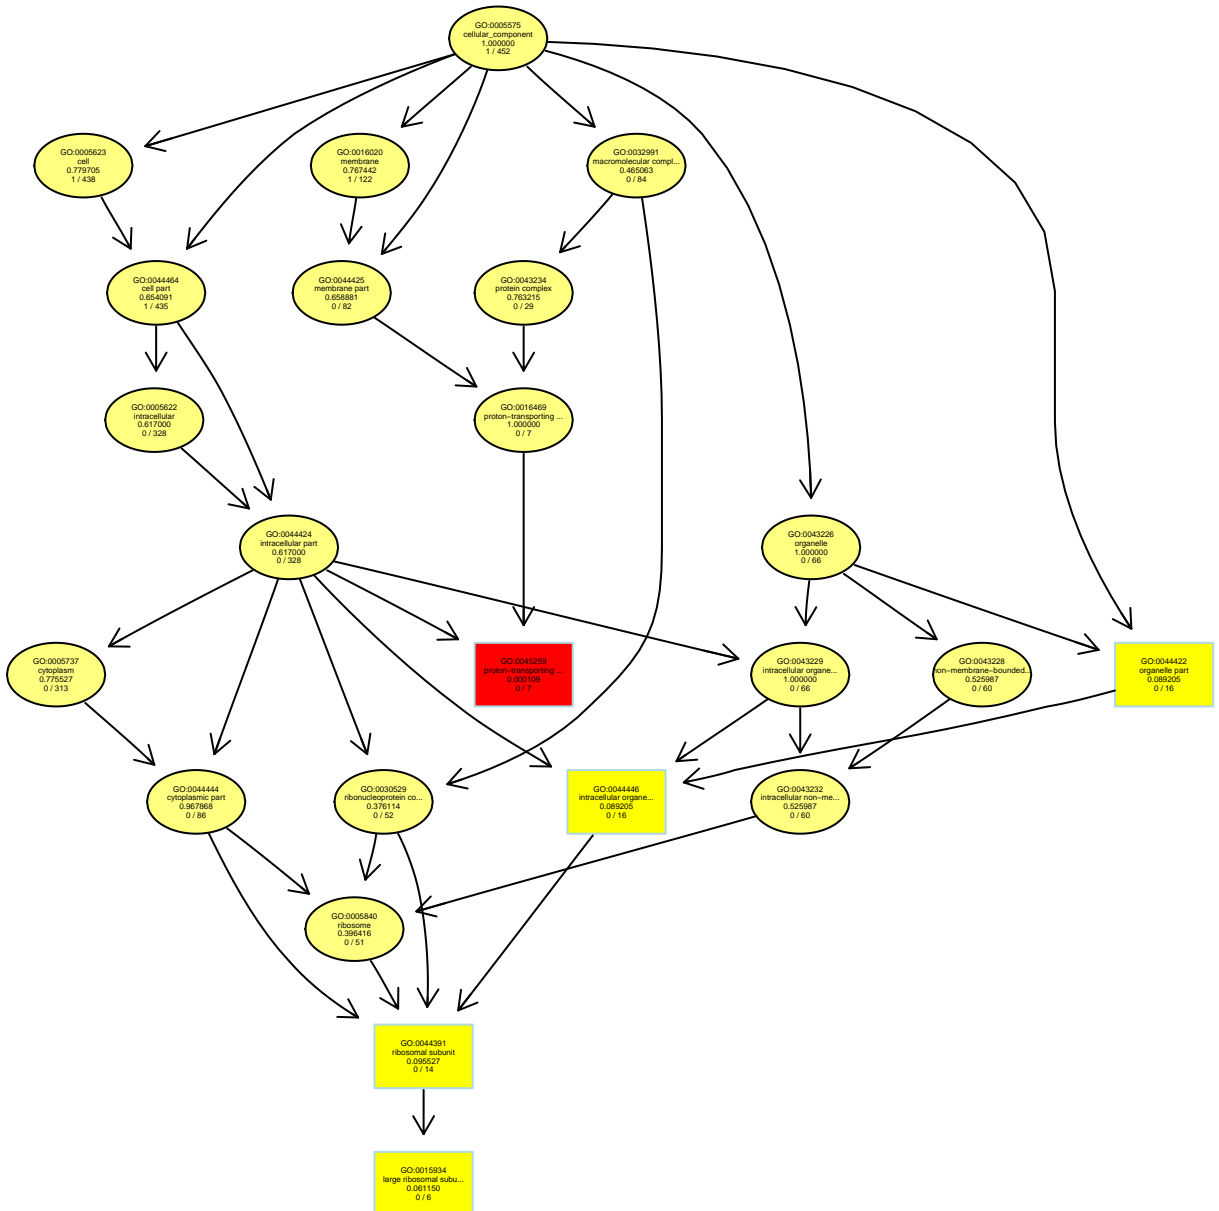

Supplement: mmc6.pdf [file mmc6.pdf]
